# Supplementary material
Source: publisher site journal article supplement (https://www.dovepress.com/article/306805)
Supplement: Supplementary file 1 [file get_supplementary_file.php]

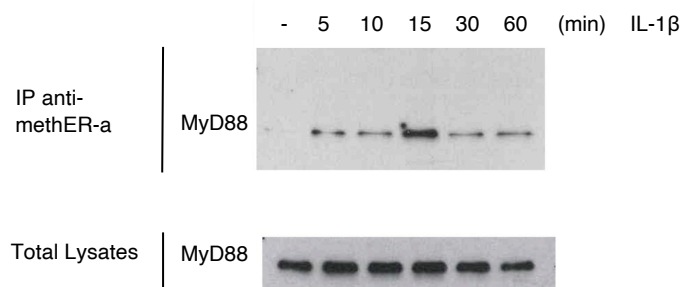

**Supplemental Figure 1:** WB with anti-MyD88 on anti-methER- $\alpha$  immunoprecipitates and total cell lysates following MCF7 cell treatment with IL-1 $\beta$

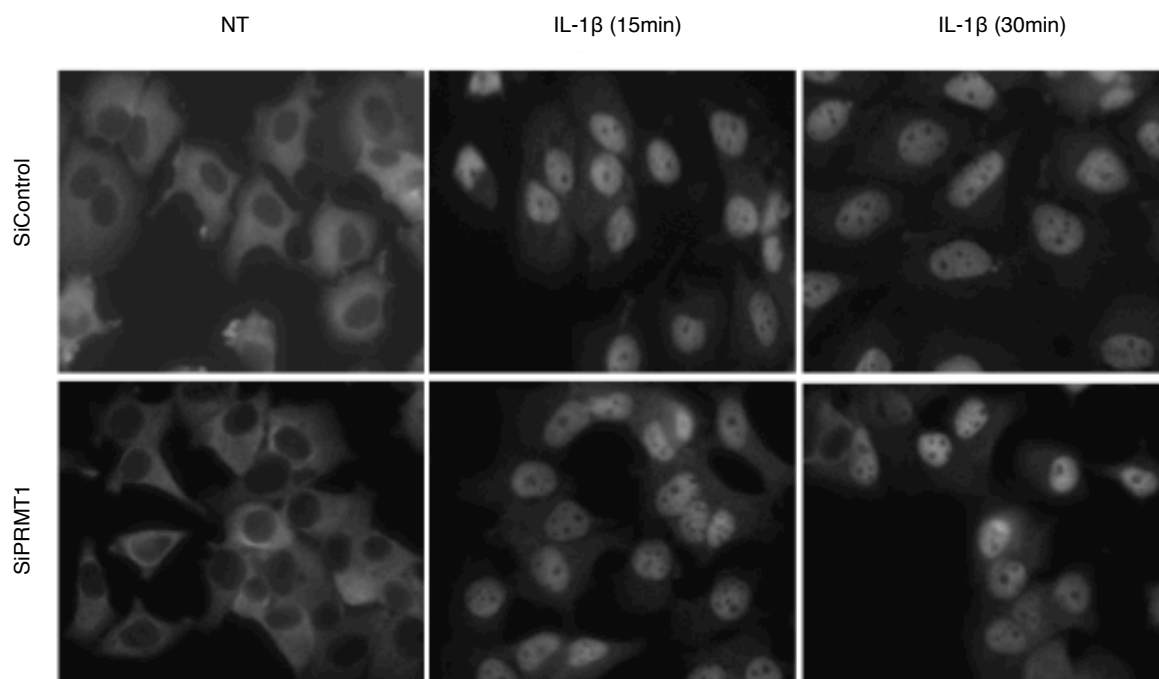

**Supplemental Figure 2:** Immunofluorescent staining showing the subcellular distribution of the p65 subunit of NF- $\kappa$ B in MCF7 cells following IL-1 treatment in presence or absence of PRMT1.
